# Supplementary material for: Two histidine-templated metal phosphate-oxalates: solvent-free synthesis, luminescence, and proton-conducting properties
Source: Royal Society of Chemistry journal article supplement (doi:10.1039/d4dt01217h), 2024-01-01
Supplement: d4dt01217h1.pdf [file d4dt01217h1.pdf]

**Two histidine-templated metal phosphate-oxalates: solvent-free  
synthesis, luminescence, and proton-conducting properties**

Ying Li,<sup>a</sup> Yulin Wang,<sup>a</sup> Juan Cheng,<sup>b</sup> Ling Huang,<sup>a</sup> Daojiang Gao,<sup>a</sup> Guohong Zou,<sup>b</sup>  
Yan Zhao<sup>\*a</sup> and Zhien Lin<sup>\*b</sup>

<sup>a</sup> *College of Chemistry and Materials Science, Sichuan Normal University, Chengdu  
610068, P. R. China.*

<sup>b</sup> *College of Chemistry, Sichuan University, Chengdu 610064, P. R. China.*

\* To whom correspondence should be addressed. Tel: +86-28-85412284. E-mail:  
zhaoyan@sicnu.edu.cn, zhienlin@scu.edu.cn.

## Synthesis

Ga<sub>2</sub>O<sub>3</sub> (99.99%, ALADDIN), In(OH)<sub>3</sub> (99.8%, ALADDIN), H<sub>2</sub>C<sub>2</sub>O<sub>4</sub>·2H<sub>2</sub>O (AR, ALADDIN), L-histidine (99%, MACKLIN), H<sub>3</sub>PO<sub>4</sub> (85%, ALADDIN), were used without further treatment.

In<sub>2</sub>(C<sub>6</sub>H<sub>10</sub>N<sub>3</sub>O<sub>2</sub>)<sub>2</sub>(HPO<sub>4</sub>)<sub>2</sub>(C<sub>2</sub>O<sub>4</sub>)<sub>2</sub> (**1**) was prepared by heating a mixture of In(OH)<sub>3</sub> (0.166 g, 1 mmol), H<sub>3</sub>PO<sub>4</sub> (68 μL, 1 mmol), H<sub>2</sub>C<sub>2</sub>O<sub>4</sub>·2H<sub>2</sub>O (0.378 g, 3 mmol), and L-histidine (0.155 g, 1 mmol) in a 25 mL Teflon-lined stainless steel autoclave at 120 °C for 7 days. After cooling to room temperature, dull yellow crystals of compound **1** were separated from the resulting product by filtration, washed with distilled water, and dried in air (58% yield based on In).

[(C<sub>6</sub>H<sub>11</sub>N<sub>3</sub>O<sub>2</sub>)<sub>2</sub>(H<sub>2</sub>C<sub>2</sub>O<sub>4</sub>)] [Ga<sub>2</sub>(HPO<sub>4</sub>)<sub>2</sub>(C<sub>2</sub>O<sub>4</sub>)<sub>3</sub>] (**2**) was prepared by heating a mixture of Ga<sub>2</sub>O<sub>3</sub> (0.094 g, 0.5 mmol), H<sub>3</sub>PO<sub>4</sub> (135 μL, 2 mmol), H<sub>2</sub>C<sub>2</sub>O<sub>4</sub>·2H<sub>2</sub>O (0.378 g, 3 mmol), and L-histidine (0.208 g, 1.25 mmol) in a 25 mL Teflon autoclave at 120 °C for 5 days. After cooling to room temperature, colourless crystals of compound **2** were separated from the resulting product by filtration, washed with distilled water, and dried in air (64% yield based on Ga).

## Single crystal X-ray diffraction

Single crystal X-ray diffraction data were collected on an Agilent Gemini E diffractometer at room temperature. The structures were refined on  $F^2$  by full-matrix least-squares methods using the *SHELXTL* program package.<sup>1,2</sup>

## Powder X-ray diffraction

Powder X-ray diffraction data were obtained using a Shimadzu XRD-6100 diffractometer with Cu-K $\alpha$  radiation ( $\lambda = 1.5418$  Å), in the angular range of  $2\theta = 5$ -50° (step width: 0.02°).

## Elemental analysis

The elemental analysis was carried out on a Vario EL Cube analyzer.

## Thermogravimetric analysis

The thermogravimetric analysis was performed on a Netzsch STA 409 PC thermal analyzer, with a heating rate of 10 °C /min in the range of RT-800 °C at N<sub>2</sub> atmosphere.

## UV-vis diffuse reflectance spectroscopy

UV-vis diffuse reflectance spectra of compounds **1** and **2** were recorded by using Shimadzu UV-2600 UV-vis spectrophotometer at room temperature. The Kubelka-Munk function is used to calculate the absorption spectrum from the reflection spectrum:  $F(R) = \alpha/S = (1-R)^2/2R$ , where  $R$  is the reflectance,  $\alpha$  is the absorption coefficient, and  $S$  is the scattering coefficient.<sup>3, 4</sup>

### **Photoluminescent spectroscopy**

The excitation spectra, emission spectra and photoluminescence quantum yield (PLQY) were measured using an Edinburgh FS-5 fluorescence spectrometer with a calibrated integrating sphere system. Time-resolved PL decay curves were measured using a Fluoromax-3 fluorescence spectrometer.

### **Alternating current impedance spectroscopy**

Alternating current impedance measurements were carried out with a Solartron SI 1260 impedance/gain-phase analyzer over the frequency range from 0.1 Hz to 10MHz with an applied voltage of 10 mV. The relative humidity was controlled by a STIK Corp. CIHI-150B incubator. The sample was pressed to form a cylindrical pellet of crystalline powder sample (~2 mm thickness  $\times$  5 mm  $\phi$ ) coated with C-pressed electrodes. Two silver electrodes were attached to both sides of pellet to form four end terminals (quasi-four-probe method).

### **Computational descriptions**

The first-principles calculations were carried out on compounds **1** and **2** by using the CASTEP software package.<sup>5</sup> The band structures and density of states (DOSs) / partial density of states (PDOSs) of compounds **1** and **2** were calculated. The gradient-corrected functional (GGA) with Perdew-Burke-Ernzer (PBE) was used for all the calculations.<sup>6</sup> All the atoms were performed by Norm-conserving pseudopotentials (NCP), with H 1s<sup>1</sup>, C 2s<sup>2</sup>2p<sup>2</sup>, N 2s<sup>2</sup>2p<sup>3</sup>, O 2s<sup>2</sup>2p<sup>4</sup>, P 3s<sup>2</sup>3p<sup>3</sup>, Ga 3d<sup>10</sup>4s<sup>2</sup>4p<sup>1</sup>, In 5s<sup>2</sup>5p<sup>1</sup> treated as valence electrons.<sup>7</sup> The kinetic energy cutoff of 750eV and the k-point sampling of  $3 \times 2 \times 1$  were chosen for the compound **1**. The kinetic energy cutoff of 800eV and the k-point sampling of  $4 \times 3 \times 3$  were chosen for the compound **2**.<sup>8</sup> All other parameter settings are CASTEP default values.

**Table S1.** Proton conductivity of compounds **1**, **2**, and some representative metal phosphate-oxalates

| Compound                                                                                                                                                                                                                                      | RH (%) | T (°C) | $\sigma$ (S cm <sup>-1</sup> )               | Reference |
|-----------------------------------------------------------------------------------------------------------------------------------------------------------------------------------------------------------------------------------------------|--------|--------|----------------------------------------------|-----------|
| In <sub>2</sub> (C <sub>6</sub> H <sub>10</sub> N <sub>3</sub> O <sub>2</sub> ) <sub>2</sub> (HPO <sub>4</sub> ) <sub>2</sub> (C <sub>2</sub> O <sub>4</sub> ) <sub>2</sub> ( <b>1</b> )                                                      | 95     | 85     | 3.41×10 <sup>-5</sup>                        | this work |
| [(C <sub>6</sub> H <sub>11</sub> N <sub>3</sub> O <sub>2</sub> ) <sub>2</sub> (H <sub>2</sub> C <sub>2</sub> O <sub>4</sub> )] [Ga <sub>2</sub> (HPO <sub>4</sub> ) <sub>2</sub> (C <sub>2</sub> O <sub>4</sub> ) <sub>3</sub> ] ( <b>2</b> ) | 40/70  | 85     | 3.71×10 <sup>-6</sup> /2.43×10 <sup>-4</sup> | this work |
| SCU-26                                                                                                                                                                                                                                        | 95     | 85     | 5.83×10 <sup>-5</sup>                        | 9         |
| SCU-27                                                                                                                                                                                                                                        | 95     | 85     | 9.03×10 <sup>-4</sup>                        | 9         |
| SCU-40                                                                                                                                                                                                                                        | 95     | 85     | 3.6×10 <sup>-4</sup>                         | 10        |
| SCU-42                                                                                                                                                                                                                                        | 95     | 85     | 4.2×10 <sup>-3</sup>                         | 11        |
| H <sub>2</sub> mpip·Sc(H <sub>2</sub> PO <sub>4</sub> ) <sub>2</sub> (C <sub>2</sub> O <sub>4</sub> )·0.5C <sub>2</sub> O <sub>4</sub> ·1.5H <sub>2</sub> O                                                                                   | 95     | 85     | 2.1×10 <sup>-5</sup>                         | 12        |
| SCU-50                                                                                                                                                                                                                                        | 95     | 75     | 1.9×10 <sup>-5</sup>                         | 13        |
| SCU-65                                                                                                                                                                                                                                        | 80     | 85     | 3.0×10 <sup>-6</sup>                         | 14        |
| SCU-25                                                                                                                                                                                                                                        | 75     | 85     | 8.1×10 <sup>-6</sup>                         | 15        |
| [(CH <sub>3</sub> ) <sub>2</sub> NH <sub>2</sub> ] <sub>2</sub> [Al <sub>2</sub> (HPO <sub>4</sub> ) <sub>2</sub> (H <sub>2</sub> PO <sub>4</sub> ) <sub>2</sub> (C <sub>2</sub> O <sub>4</sub> )                                             | 98     | 85     | 9.09×10 <sup>-3</sup>                        | 16        |
| [(CH <sub>3</sub> ) <sub>2</sub> NH <sub>2</sub> ] <sub>2</sub> [Ga <sub>2</sub> (HPO <sub>4</sub> ) <sub>2</sub> (H <sub>2</sub> PO <sub>4</sub> ) <sub>2</sub> (C <sub>2</sub> O <sub>4</sub> )                                             | 98     | 85     | 6.43×10 <sup>-3</sup>                        | 16        |
| C <sub>4</sub> N <sub>2</sub> H <sub>14</sub> ·Sc <sub>2</sub> (HPO <sub>4</sub> )(H <sub>2</sub> PO <sub>4</sub> ) <sub>2</sub> (C <sub>2</sub> O <sub>4</sub> ) <sub>2</sub> ·3H <sub>2</sub> O                                             | 95     | 85     | 5.4×10 <sup>-4</sup>                         | 17        |
| V <sub>2</sub> O <sub>2</sub> (HPO <sub>4</sub> )(HPO <sub>3</sub> )(C <sub>2</sub> O <sub>4</sub> ) <sub>2</sub> (C <sub>4</sub> N <sub>2</sub> H <sub>12</sub> ) <sub>2</sub> ·2H <sub>2</sub> O                                            | 98     | 75     | 4.35×10 <sup>-4</sup>                        | 18        |

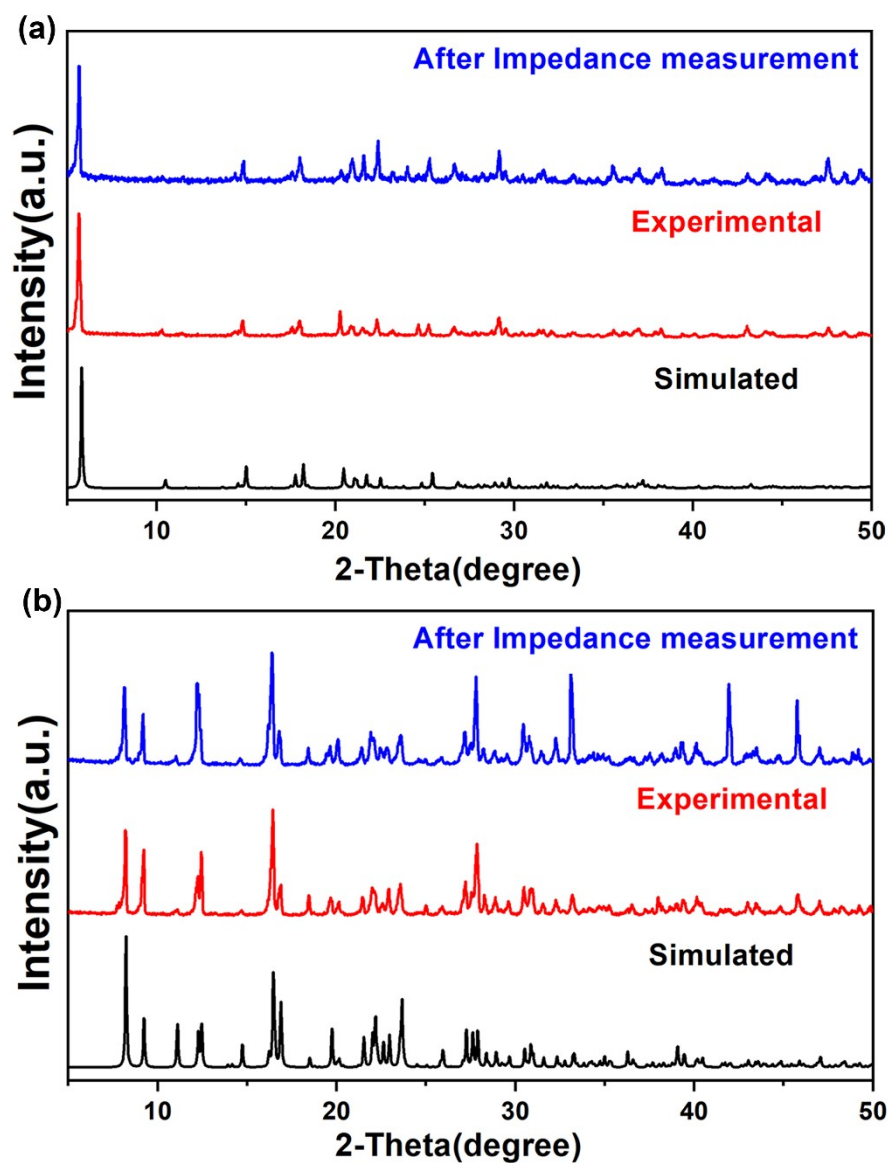

Fig. S1 Powder X-ray diffraction patterns of compound 1 (a) and compound 2 (b).

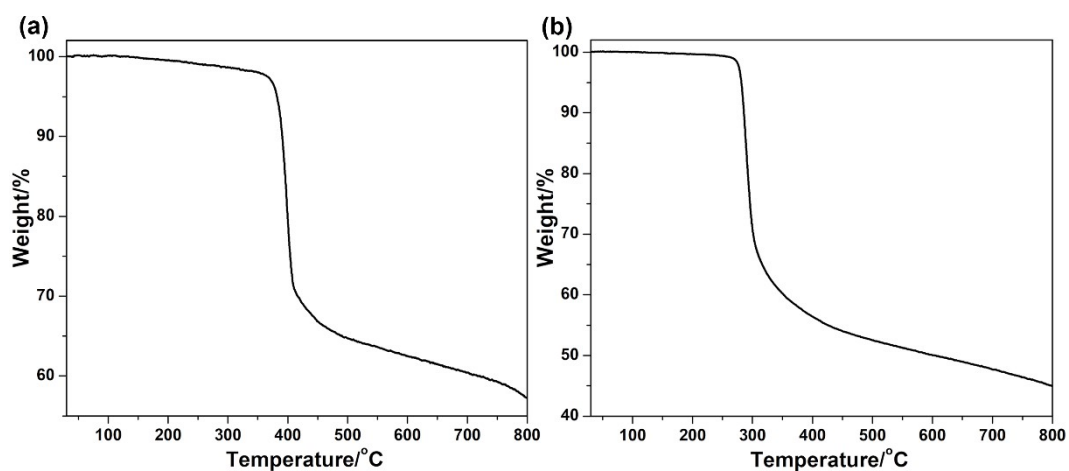

Fig. S2 TGA curves of compound 1 (a) and compound 2 (b) under N<sub>2</sub> atmosphere.

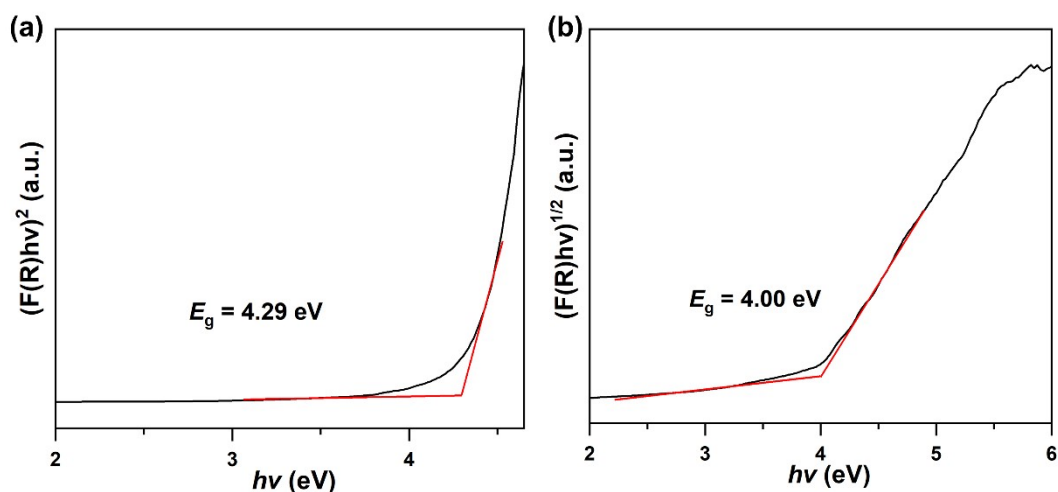

**Fig. S3** (a) The Tauc plots of compound **1** showing the optical band gap. (b) The Tauc plots of compound **2** showing the optical band gap.

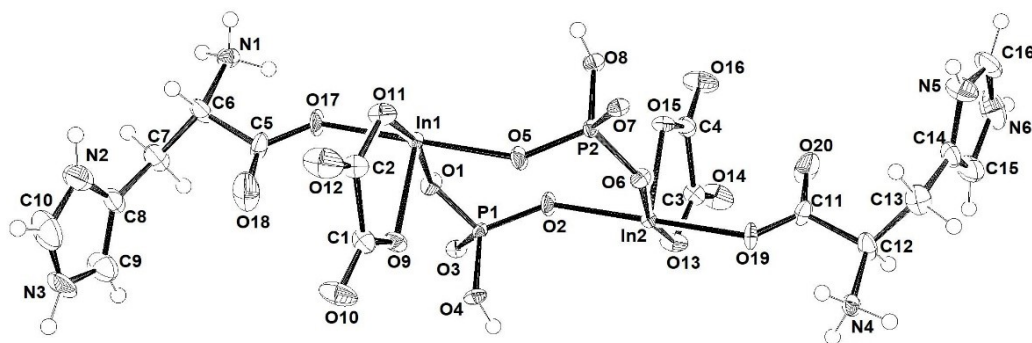

**Fig. S4** ORTEP plot of the asymmetric unit of compound **1**, showing the labeling scheme and the 50% probability displacement ellipsoids.

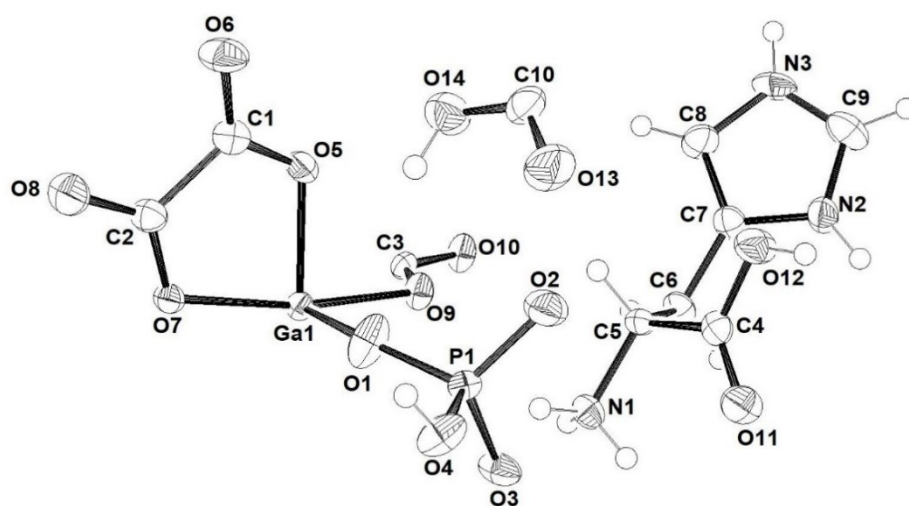

**Fig. S5** ORTEP plot of the asymmetric unit of compound **2**, showing the labeling scheme and the 50% probability displacement ellipsoids.

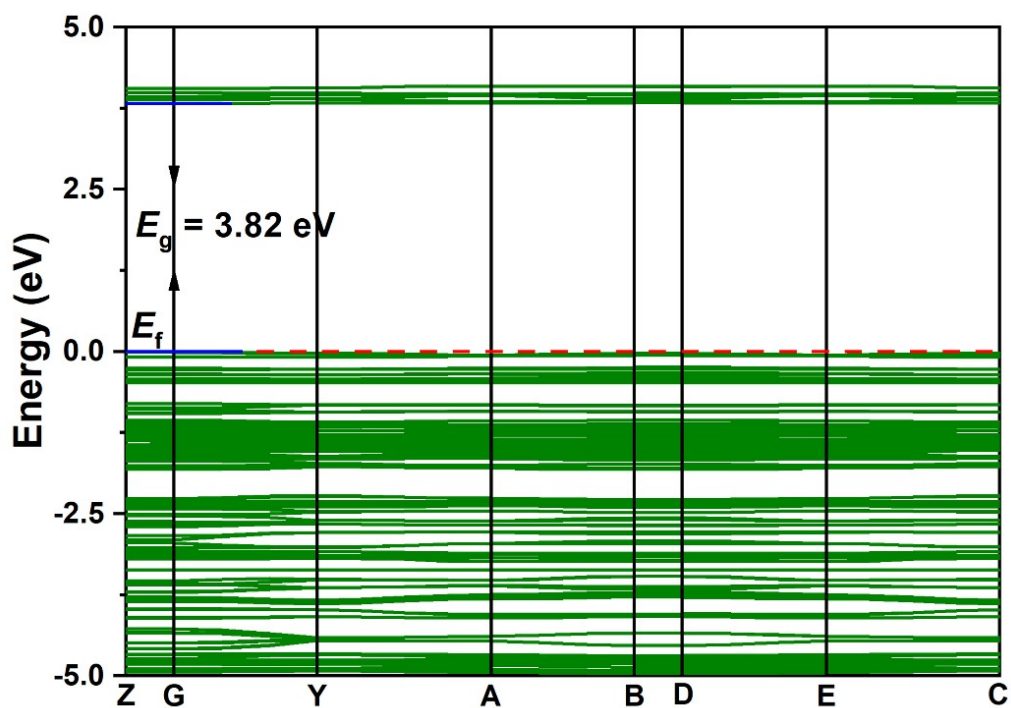

Fig. S6 Calculated band structure of compound 1 (the Fermi level is set at 0 eV).

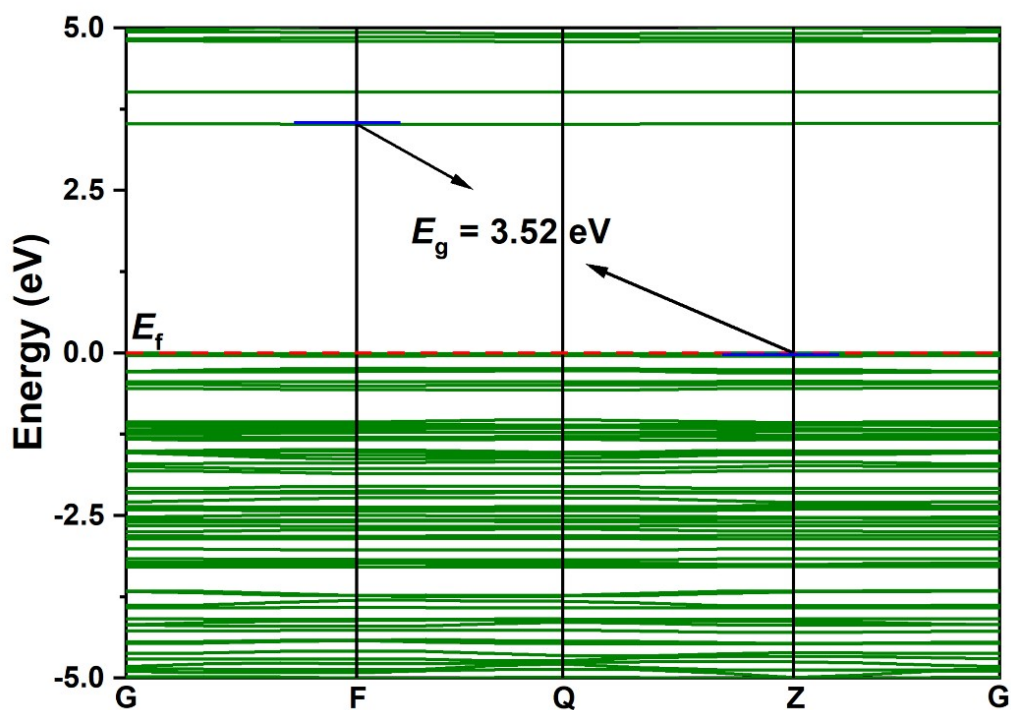

Fig. S7 Calculated band structure of compound 2 (the Fermi level is set at 0 eV).

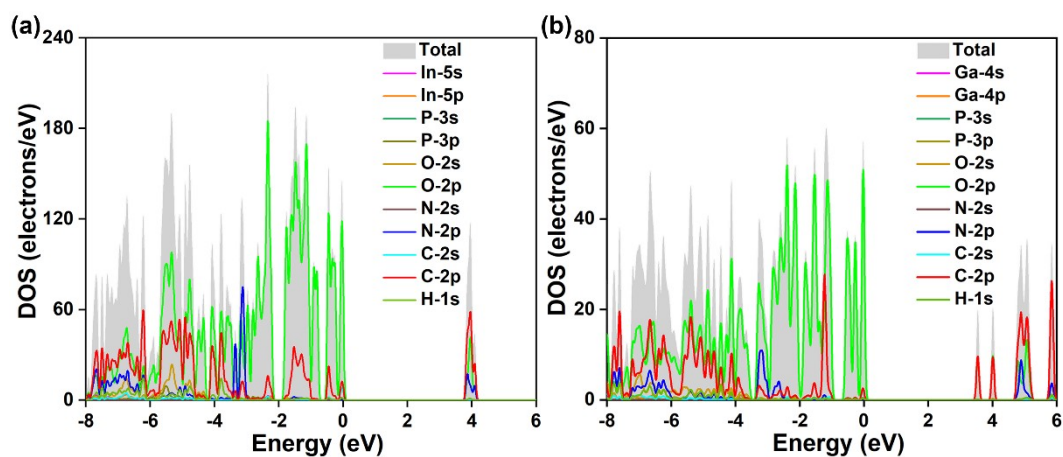

**Fig. S8** Total and partial DOS of compound **1** (a) and compound **2** (b).

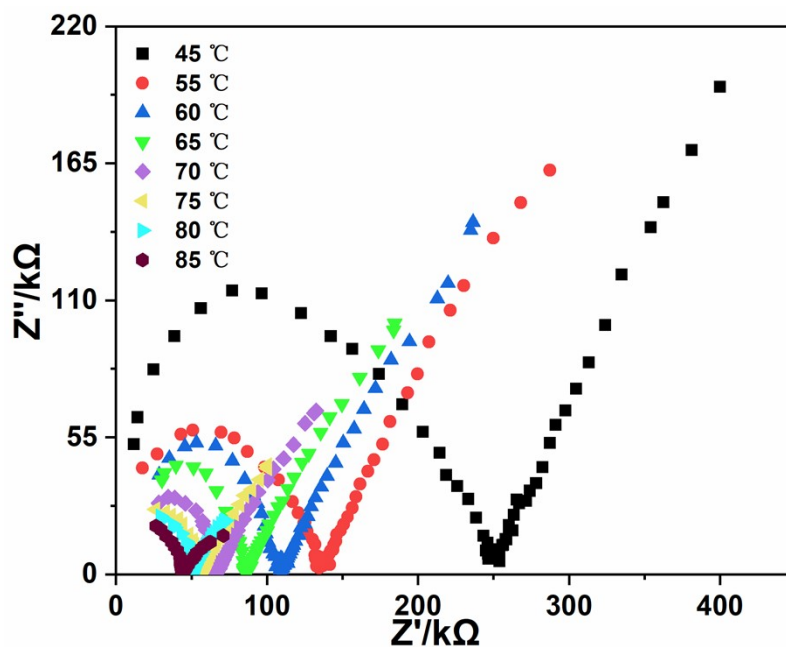

**Fig. S9** Nyquist plots of compound **1** at different temperature under 95% relative humidity.

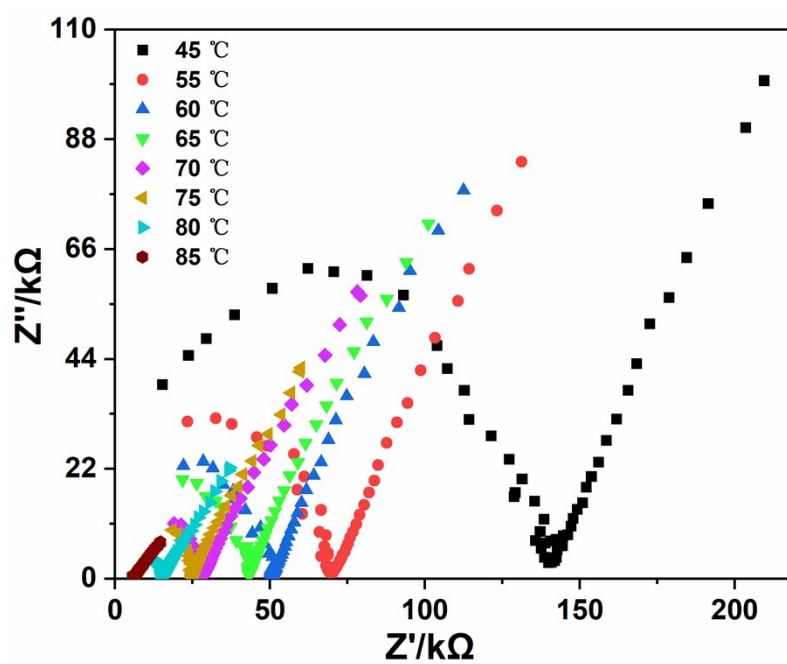

**Fig. S10** Nyquist plots of compound **2** at different temperature under 75% relative humidity.

## References

1. G. M. Sheldrick, *Acta Cryst.*, 2015, *A71*, 3.
2. G. M. Sheldrick, *Acta Cryst.*, 2015, *C71*, 3.
3. P. Kubelka and F. Z. Munk, *Tech. Phys.*, 1931, **12**, 593.
4. J. Tauc, *Mater. Res. Bull.*, 1970, **5**, 721.
5. M. D. Segall, P. J. D. Lindan, M. J. Probert, C. J. Pickard, P. J. Hasnip, S. J. Clark and M. C. Payne, *J. Phys. Condens. Matter.*, 2002, **14**, 2717.
6. J. P. Perdew, K. Burke and M. Ernzerhof, *Phys. Rev. Lett.*, 1996, **77**, 3865.
7. K. Kobayashi, *Comput. Mater. Sci.*, 1999, **14**, 72.
8. D. Vanderbilt, *Phys. Rev. B.*, 1990, **41**, 7892.
9. L. Huang, H. Xu, Y. Zhao, L. Huang, J. Bi, H. Zeng, G. Zou, D. Gao and Z. Lin, *CrystEngComm*, 2021, **23**, 6855.
10. J. Zhang, Q. Lei, L. Luan, H. Zeng, G. Zou and Z. Lin, *CrystEngComm*, 2022, **24**, 743.
11. M. Widelicka, K. Pogorzelec-Glaser, R. Pankiewicz and A. Łapiński, *J. Raman Spectrosc.*, 2019, **50**, 1914.
12. Y. Cao, X. Zhou, L. Luan, H. Zeng, G. Zou and Z. Lin, *Inorg. Chem. Commun.*, 2021, **124**, 108403.
13. Y. Zhang, H. Jiang, L. Luan, H. Zeng, G. Zou and Z. Lin, *J. Solid State Chem.*, 2020, **292**, 121709.
14. L. Luan, Y. Zhang, H. Zeng, G. Zou, Y. Dai, X. Zhou and Z. Lin, *Dalton Trans.*, 2019, **48**, 13130.
15. M. Yang, Q. Lei, L. Luan, H. Zeng, G. Zou and Z. Lin, *Inorg. Chem. Commun.*, 2021, **133**, 108975.
16. T. Y. Pan, W. Y. Wen, W. Ma, S. T. Zheng, M. L. Feng and X. Y. Huang, *Dalton Trans.*, 2024, **53**, 2318.
17. J. Zhang, D. Zhu, L. Luan, H. Zeng, G. Zou and Z. Lin, *Inorg. Chem. Commun.*, 2022, **140**, 109430.
18. Y. Yang, L. Huang, B. Li, S. Zhao, F. Zhang and Y. Bi, *Inorg. Chem. Commun.*, 2022, **141**, 109545.
